# Supplementary material for: Simultaneous quantification of alpha-aminoadipic semialdehyde, piperideine-6-carboxylate, pipecolic acid and alpha-aminoadipic acid in pyridoxine-dependent epilepsy
Source: PubMed Central journal article supplement (PMC6684619; doi:10.1038/s41598-019-47882-2), 2019-08-06
Supplement: 41598_2019_47882_MOESM1_ESM.pdf [file 41598_2019_47882_MOESM1_ESM.pdf]

## Title page

**Title:** Simultaneous quantification of alpha-aminoadipic semialdehyde, piperidine-6-carboxylate, pipercolic acid and alpha-aminoadipic acid in pyridoxine-dependent epilepsy

**Running head:** Simultaneous quantification of PDE biomarkers

**Authors:** Jiao Xue<sup>1</sup>, Junjuan Wang<sup>2</sup>, Pan Gong<sup>1</sup>, Minhang Wu<sup>2</sup>, Wenshuang Yang<sup>3</sup>, Shiju Jiang<sup>3</sup>, Ye Wu<sup>1</sup>, Yuwu Jiang<sup>1</sup>, Yuehua Zhang<sup>1</sup>, Tatiana Yuzyuk<sup>4,5</sup>, Hong Li<sup>6</sup>, Zhixian Yang<sup>1\*</sup>

**Affiliation for all authors:**

<sup>1</sup>Department of Pediatrics, Peking University First Hospital, Beijing, China.

<sup>2</sup>Zhejiang Biosan Biochemical Technologies Co., Ltd, Zhejiang, China.

<sup>3</sup>Department of Clinical Laboratory, Peking University First Hospital, Beijing, China.

<sup>4</sup>Department of Pathology, University of Utah, Salt Lake City, UT, USA.

<sup>5</sup>ARUP Laboratories, ARUP Institute for Clinical and Experimental Pathology, Salt Lake City, UT, USA.

<sup>6</sup>Department of Human Genetics, Emory University, School of Medicine, America.

**Table S1. The cone and collision energy for the detection of  $\alpha$ -AASA, P6C,  $\alpha$ -AAA, d3- $\alpha$ -AAA, PA and d9-PA.**

| <b>Name</b>                       | <b>Q1(m/z)</b> | <b>Q3(m/z)</b> | <b>Cone/V</b> | <b>CE/V</b> | <b>RT/min</b> |
|-----------------------------------|----------------|----------------|---------------|-------------|---------------|
| <b><math>\alpha</math>-AASA</b>   | 202.2          | 81.9           | 25            | 25          | 1.86          |
| <b>P6C</b>                        | 184.1          | 81.9           | 35            | 18          | 2.37          |
| <b><math>\alpha</math>-AAA</b>    | 274.3          | 98.1           | 30            | 22          | 2.41          |
| <b>d3-<math>\alpha</math>-AAA</b> | 277.3          | 101.1          | 30            | 22          | 2.38          |
| <b>d9-PA</b>                      | 195.2          | 93.1           | 30            | 18          | 1.87          |
| <b>PA</b>                         | 186.2          | 84.1           | 35            | 28          | 1.85          |

**Table S2. The limit of detection (LOD) and limit of quantification (LOQ) for all analytes.**

| <b>Metabolites<br/>(<math>\mu</math>mol/L)</b> | <b>urine<br/>(LOD)</b> | <b>Plasma<br/>(LOD)</b> | <b>DBS<br/>(LOD)</b> | <b>Urine<br/>(LOQ)</b> | <b>Plasma<br/>(LOQ)</b> | <b>DBS<br/>(LOQ)</b> |
|------------------------------------------------|------------------------|-------------------------|----------------------|------------------------|-------------------------|----------------------|
| <b><math>\alpha</math>-AASA</b>                | 0.063                  | 0.072                   | 0.020                | 0.265                  | 0.137                   | 0.090                |
| <b>P6C</b>                                     | 0.103                  | 0.148                   | 0.046                | 0.394                  | 0.481                   | 0.189                |
| <b>PA</b>                                      | 0.026                  | 0.037                   | 0.021                | 0.103                  | 0.128                   | 0.081                |
| <b><math>\alpha</math>-AAA</b>                 | 0.021                  | 0.032                   | 0.023                | 0.098                  | 0.116                   | 0.083                |

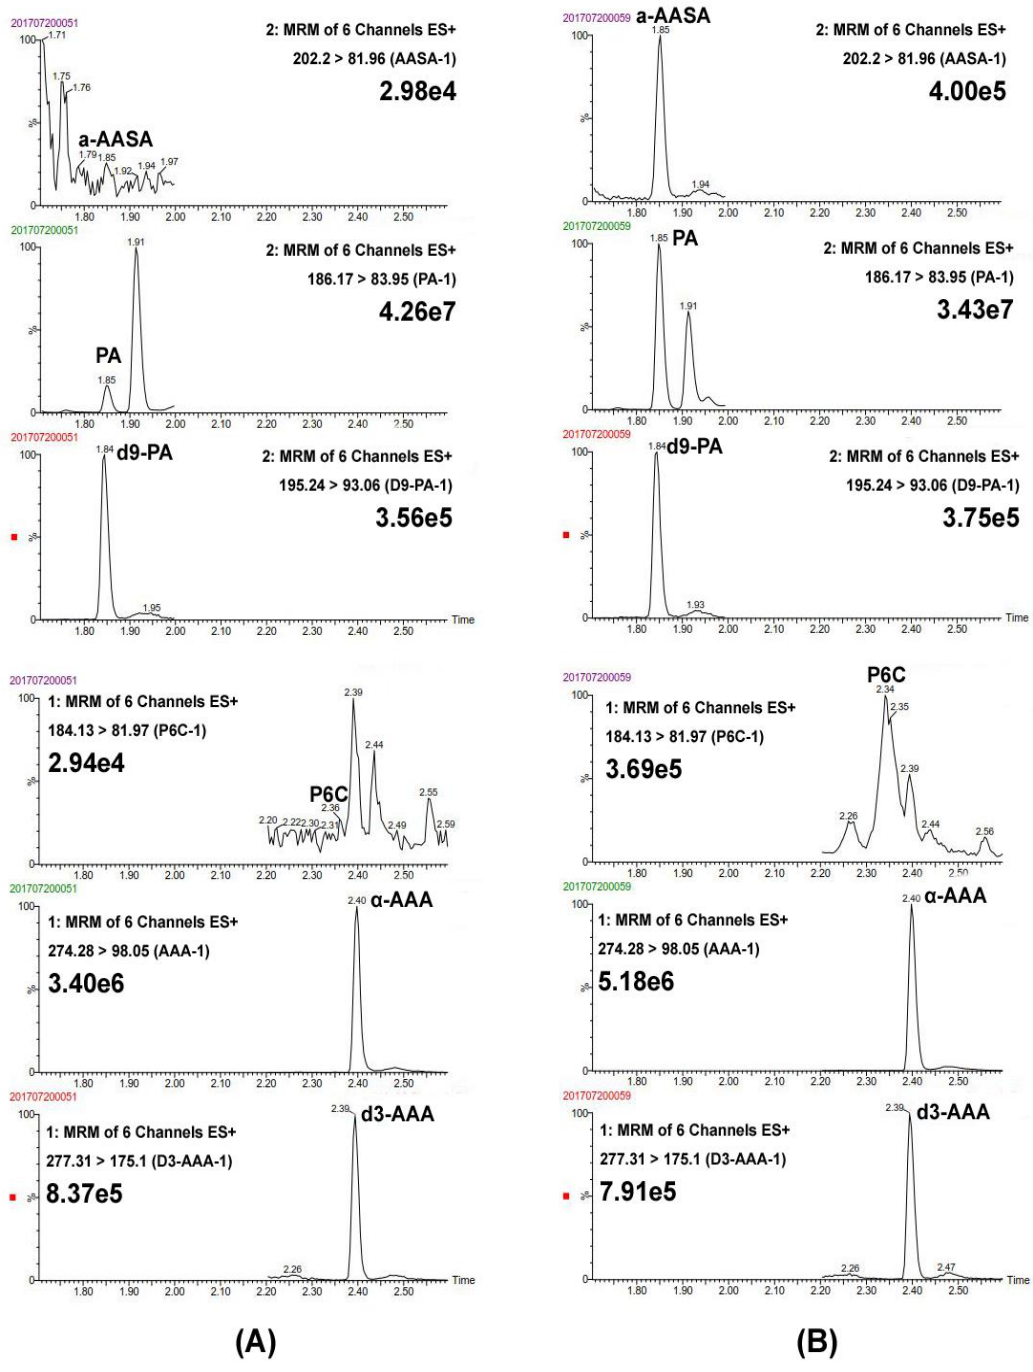

**Fig. S1.** The classic extract ion chromatogram of a-AASA, P6C, PA, a-AAA, d9-PA and d3-AAA in control and PDE patient in plasma samples.

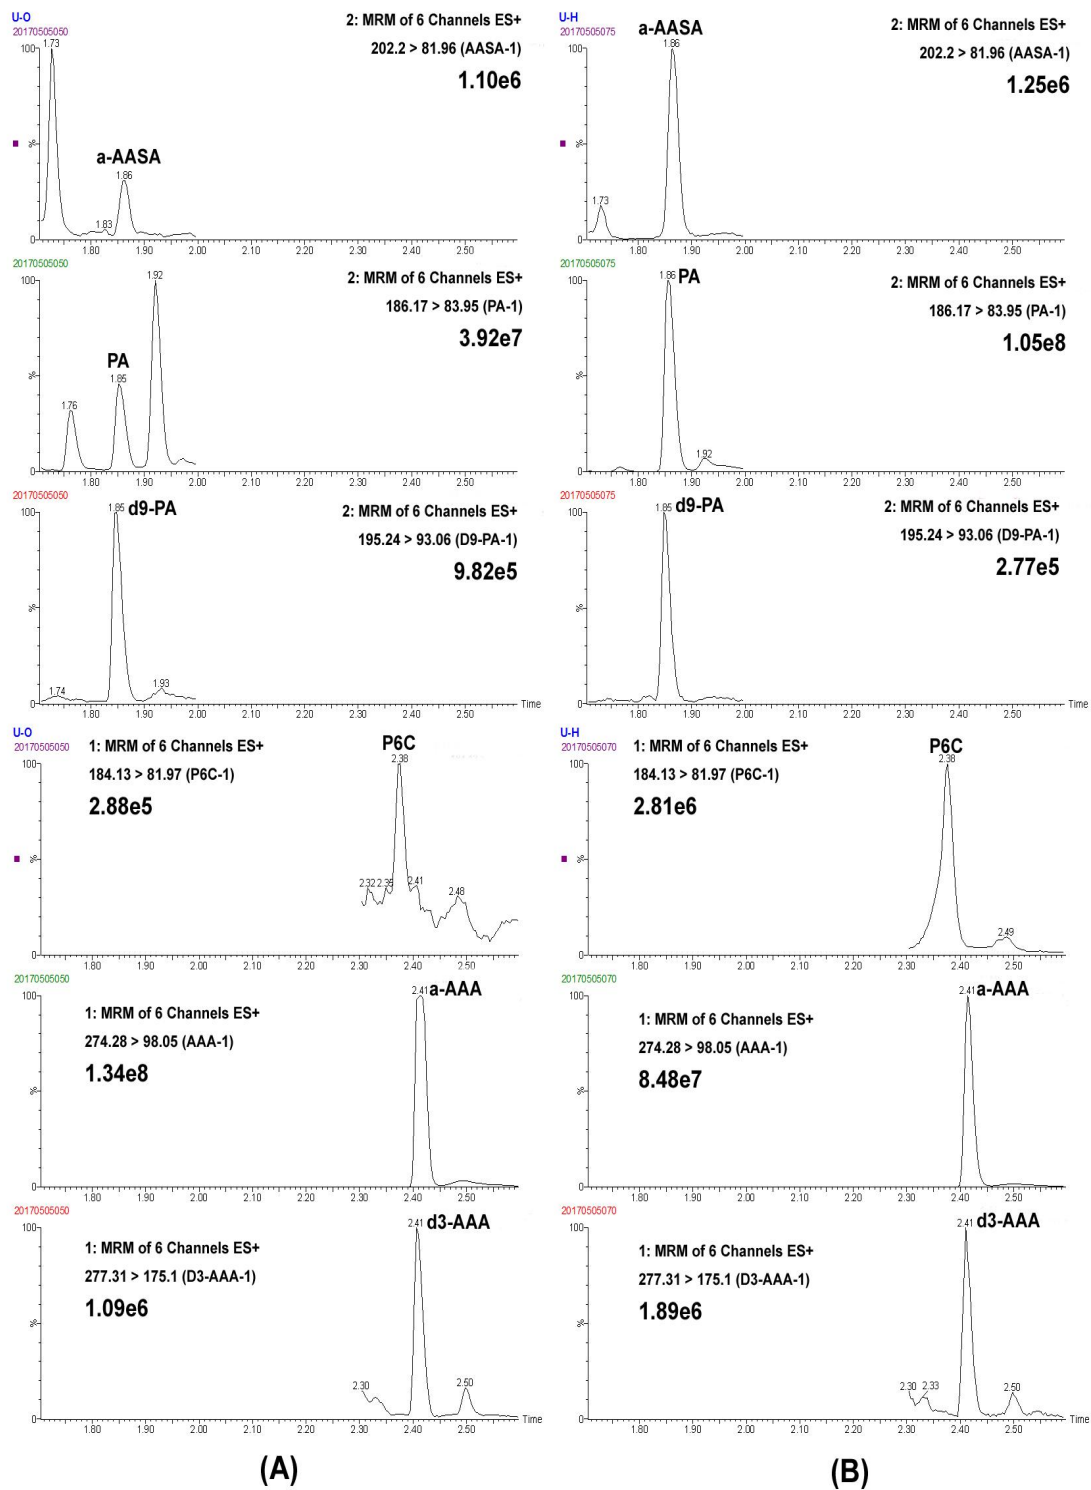

**Fig. S2.** The classic extract ion chromatogram of a-AASA, P6C, PA, a-AAA, d9-PA and d3-AAA in control and PDE patient in urine samples.

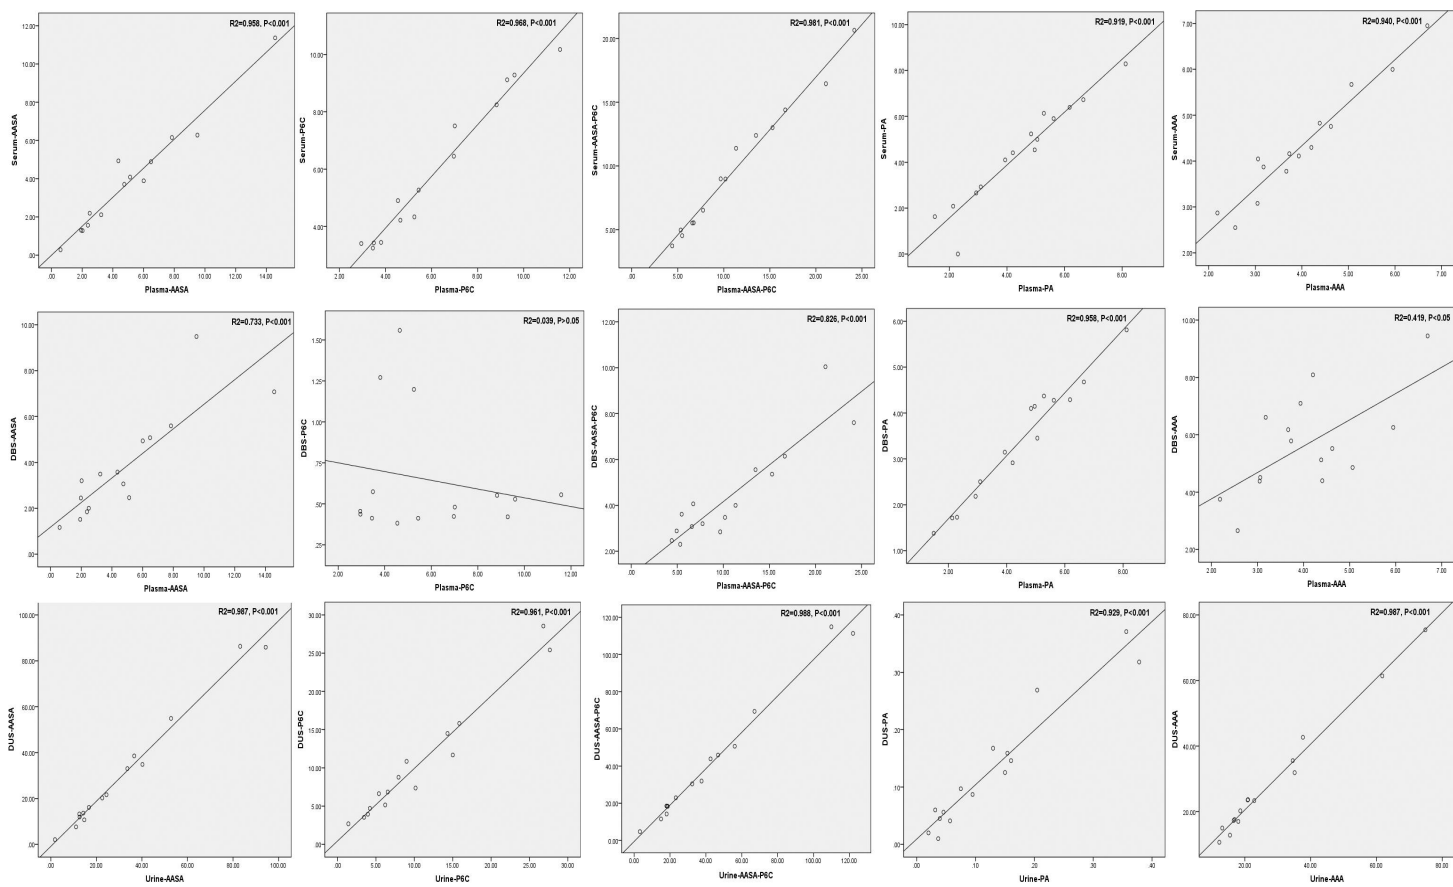

**Fig. S3.** Correlations of the metabolites concentrations between plasma and serum, plasma and DBS, and urine and DUS.
